# Supplementary material for: Vascular endothelial growth factor inhibitors for predominantly Caucasian myopic choroidal neovascularization: 2‐year treatment outcomes in clinical practice: data from the Fight Retinal Blindness! Registry
Source: PubMed Central journal article supplement (PMC9290852; doi:10.1111/aos.14893), 2021-05-06
Supplement: AOS-100-e288-s001.pdf [file AOS-100-e288-s001.pdf]

**Table S.** Last observation of eyes that switched treatment and eyes that did not complete the two years of follow-up.

|                                                             | Switchers   |                          |                          |             | Non-completers |             |             |          |
|-------------------------------------------------------------|-------------|--------------------------|--------------------------|-------------|----------------|-------------|-------------|----------|
|                                                             | Overall     | Initially<br>bevacizumab | Initially<br>ranibizumab | <i>P</i>    | Overall        | Bevacizumab | Ranibizumab | <i>P</i> |
| Eyes, n                                                     | 41          | 21                       | 20                       |             | 60             | 32          | 28          |          |
| Patients, n                                                 | 41          | 21                       | 20                       |             | 60             | 32          | 28          |          |
| Baseline VA letters, mean (SD)                              | 51 (20)     | 48 (21)                  | 55 (19)                  | 0.25        | 49 (20)        | 49 (19)     | 48 (21)     | 0.86     |
| Final VA letters, mean (SD)                                 | 56 (22)     | 60 (18)                  | 52 (25)                  | 0.29        | 53 (24)        | 52 (25)     | 54 (22)     | 0.87     |
| Crude VA change at switch or dropout letters, mean (95% CI) | 4 (-1, 10)  | 9 (2, 16)                | -1 (-9, 7)               | 0.054       | 4 (0, 8)       | 2 (-3, 8)   | 6 (0, 12)   | 0.64     |
| Gain ≥ 15 letters, %                                        | 29          | 38                       | 20                       | 0.35        | 23             | 19          | 29          | 0.79     |
| Loss ≥ 15 letters, %                                        | 15          | 0                        | 30                       | <b>0.02</b> | 8              | 9           | 7           | 1.0      |
| VA ≥ 70 letters, %, Baseline / Final                        | 24 / 32     | 29 / 33                  | 20 / 30                  | 1.0         | 18 / 25        | 19 / 25     | 18 / 25     | 1.0      |
| VA ≤ 35 letters, %, Baseline / Final                        | 29 / 24     | 43 / 19                  | 15 / 30                  | 0.65        | 25 / 28        | 25 / 31     | 25 / 25     | 0.98     |
| Proportion of active visits, %                              | 46          | 49                       | 43                       | 0.55        | 58             | 61          | 55          | 0.83     |
| Number of injections, median (Q1, Q3)                       | 7 (4, 10)   | 8 (4, 11)                | 5 (4, 8)                 | 0.43        | 3 (2, 4)       | 3 (2, 3)    | 3 (2, 4)    | 0.22     |
| Number of visits, median (Q1, Q3)                           | 13 (10, 19) | 14 (11, 19)              | 13 (8, 16)               | 0.24        | 6 (4, 8)       | 5 (4, 7)    | 7 (4, 8)    | 0.23     |

n, number; VA, visual acuity; SD, standard deviation; CI, confidence interval; Q1, first quantile; Q3, third quantile.

“Switchers” – Eyes receiving ≥2 injections of the drug other than the one they started with during the follow-up.

“Non-Completers” – Eyes not completing 24 months of observations from the start of treatment.

Significant p-values are highlighted in bold.
