# Supplementary material for: Vascular endothelial growth factor inhibitors for predominantly Caucasian myopic choroidal neovascularization: 2‐year treatment outcomes in clinical practice: data from the Fight Retinal Blindness! Registry
Source: PubMed Central journal article supplement (PMC9290852; doi:10.1111/aos.14893), 2021-05-06
Supplement: AOS-100-e288-s002.pdf [file AOS-100-e288-s002.pdf]

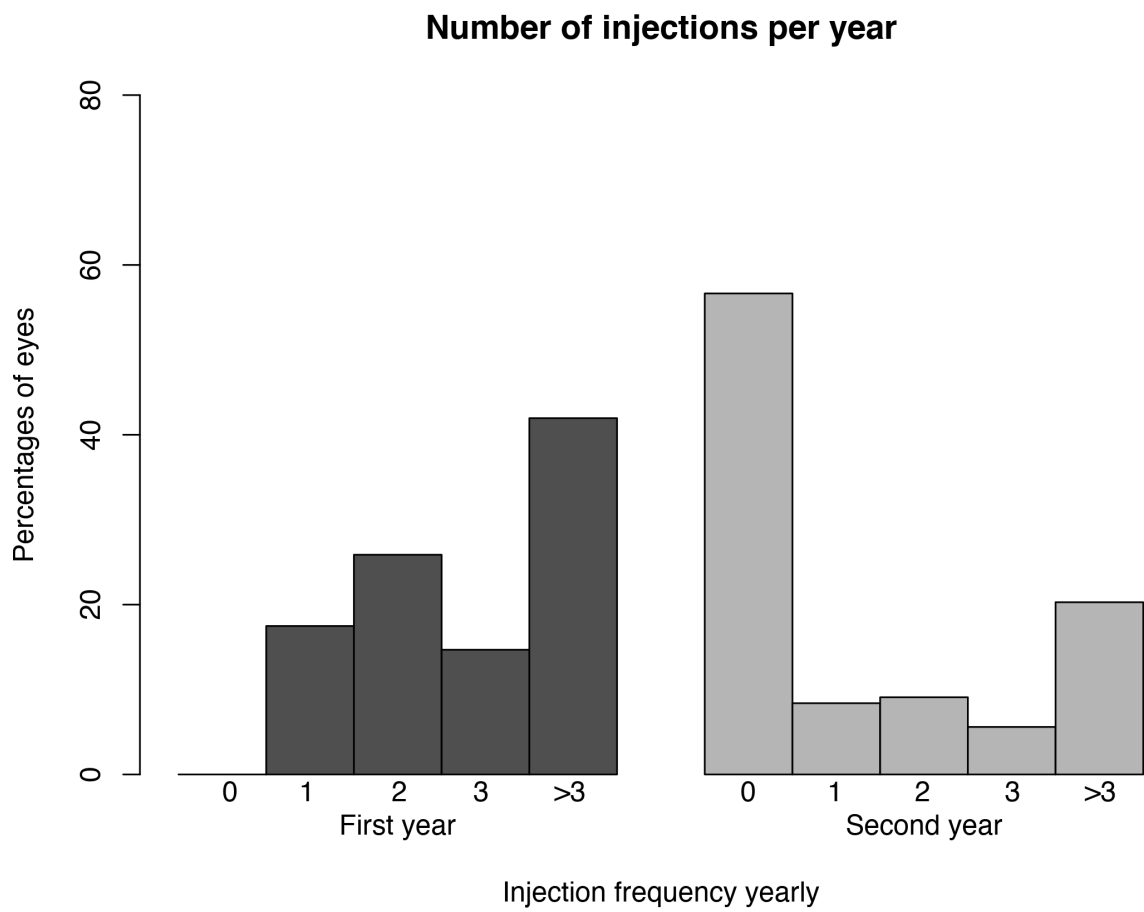

**Figure S.** Bar plot showing the number of injections yearly in eyes that completed the two years of follow-up.
